# Supplementary material
Source: publisher figshare collection journal article supplement (https://acs.figshare.com/ndownloader/files/5318449)
Supplement: Supplementary file 1 [file 5318449]

# Supporting Information for:

## A New Route for Surface Modification: Fluorine-Induced Superhydrophilicity

*Zhi-Yong Luo, Kai-Xuan Chen, Dong-Chuan Mo\* and Shu-Shen Lyu\**

School of Chemical Engineering and Technology, Sun Yat-sen University, Guangzhou 510275,  
China

\*Tel: +86-020-84113985. E-mail: [modongch@mail.sysu.edu.cn](mailto:modongch@mail.sysu.edu.cn)

\*Tel: +86-020-84112151. E-mail: [lvshsh@mail.sysu.edu.cn](mailto:lvshsh@mail.sysu.edu.cn)

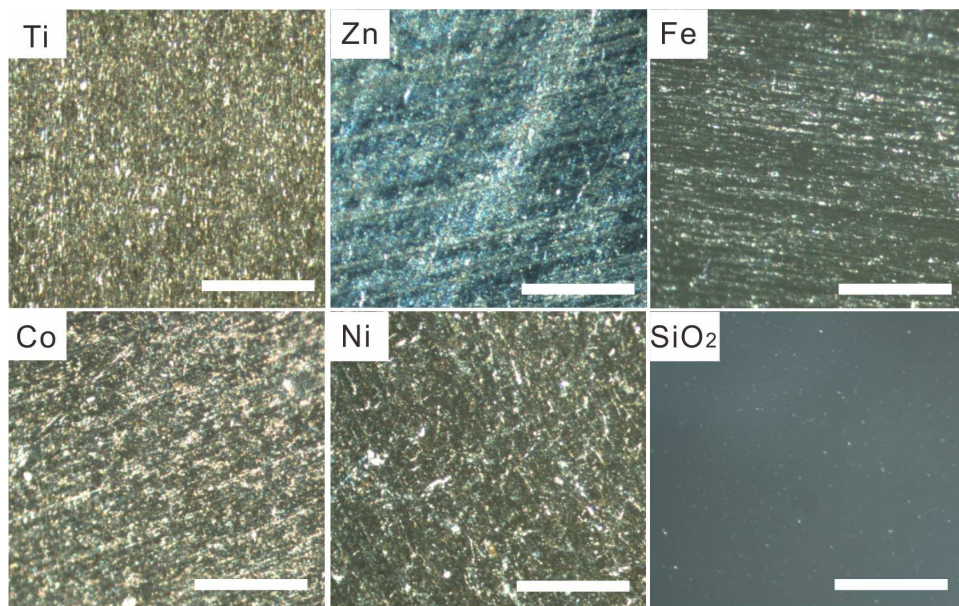

**Figure S1** The micrographs of Ti, Zn, Fe, Co, Ni and glass ( $\text{SiO}_2$ ) before oxy-fluoridation, respectively. The bar is 200  $\mu\text{m}$ .

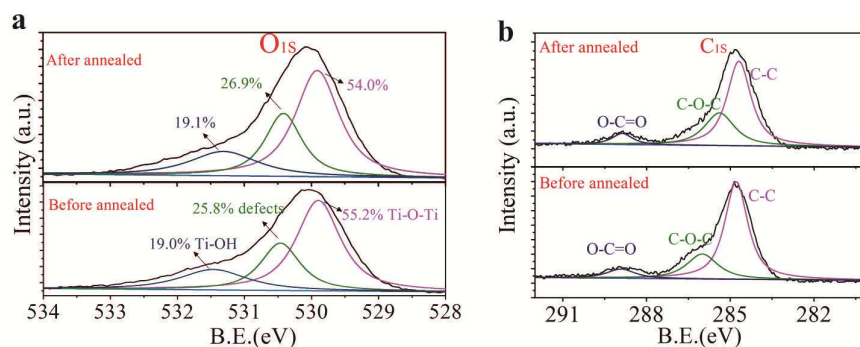

**Figure S2** The XPS analysis of O and C of TiO<sub>2</sub> island arrays (TiIAs). (a) the XPS analysis of O element. The O element represents for three components, the surface hydroxyl species (H<sub>2</sub>O and Ti-OH) which will affect the wettability of TiIAs are almost unchanged after annealed. (b) the XPS analysis of C element. The C element also represents for three components, their contents are almost remain the same after annealed.

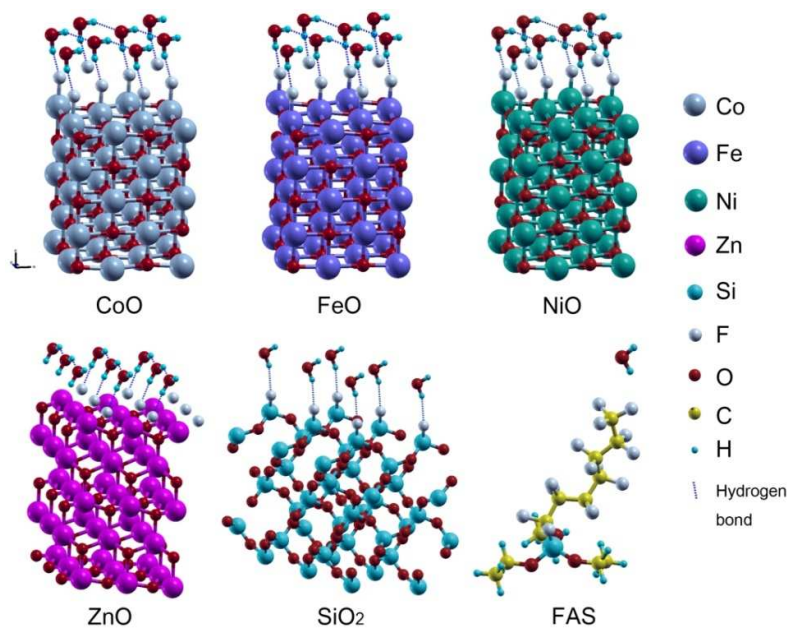

**Figure S3** Computational models of interaction forces between oxy-fluoridized interfaces and water molecules.

**Table S1.** Details of computational data of bond energies.

| <b>Surface</b>             | <b>Bond Energy<br/>kJ·mol<sup>-1</sup></b> | <b>Surface</b> | <b>Bond Energy<br/>kJ·mol<sup>-1</sup></b> |
|----------------------------|--------------------------------------------|----------------|--------------------------------------------|
| TiO <sub>2</sub> -F        | 26.16                                      | ZnO-F          | 27.23                                      |
| TiO <sub>2</sub> -OH       | 17.88                                      | NiO-F          | 19.24                                      |
| SiO <sub>2</sub> _quartz-F | 7.232                                      | CoO-F          | 19.14                                      |
| FAS molecular              | 5.469                                      | FeO-F          | 16.48                                      |

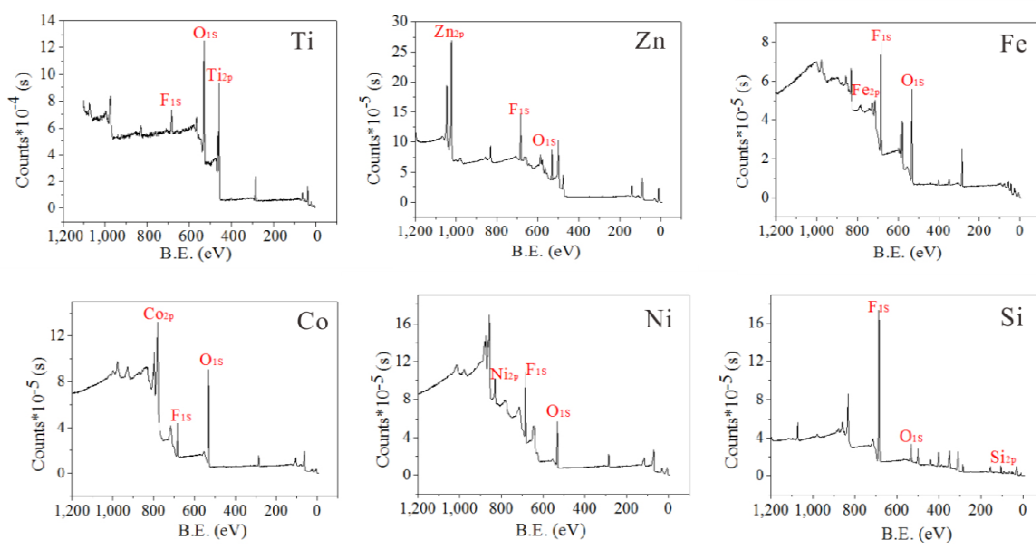

**Figure S4** X-ray photoelectron spectrums of oxy-fluoridized interfaces. Each interface mainly consists of O, F and element itself.

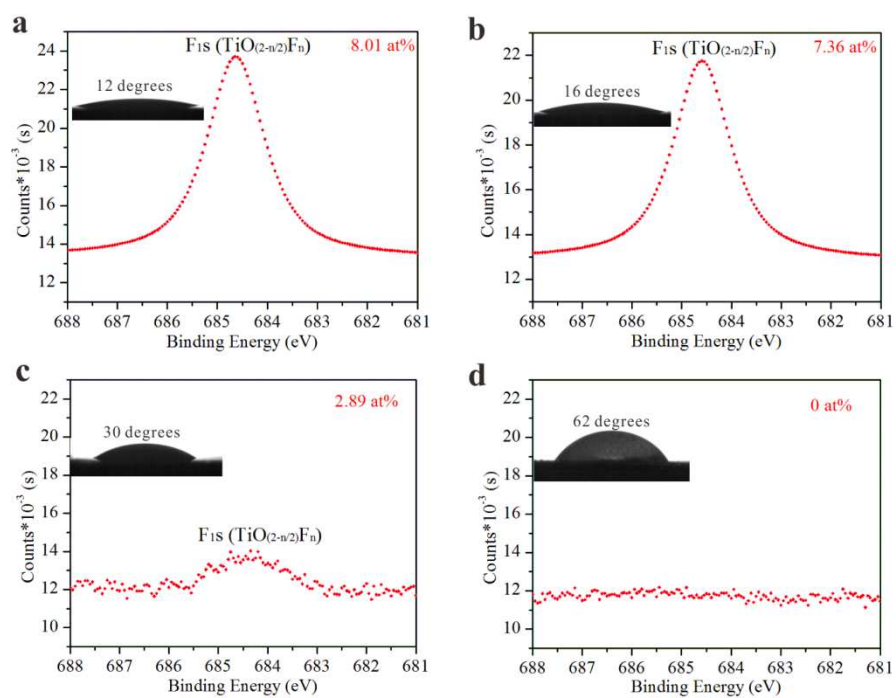

**Figure S5** The stability of fluorine-induced superhydrophobicity (FIS) under annealing. (a) as-prepared specimen and annealed under (b) 100 °C; (c) 200 °C; (d) 300 °C for 2 h. The FIS can bear about 100 °C temperature, the wettability of specimens is degenerated as the content of oxy-fluorides decreased.
